# Supplementary material for: Is exposure to e-cigarette communication associated with perceived harms of e-cigarette secondhand vapour? Results from a national survey of US adults
Source: HighWire-hosted journal article supplement (doi:10.1136/bmjopen-2014-007134), 2015-03-01
Supplement: bmjopen-2014-007134supp_table2.pdf [file bmjopen-2014-007134supp_table2.pdf]

**Supplemental Table 2 – Correlations between exposure measures and perceived harm measures**

|                                                   | Harmful<br>to health | Concerned<br>about<br>health<br>impact of<br>vapor | Compared<br>with<br>secondhand<br>smoke |
|---------------------------------------------------|----------------------|----------------------------------------------------|-----------------------------------------|
| Frequency of ad exposure (n=1443)                 | -0.086**             | -0.0950***                                         | -0.102***                               |
| Frequency of media exposure (n=1443)              | -0.041               | -0.045                                             | -0.034                                  |
| Frequency of interpersonal discussion (n=1443)    | -0.187***            | -0.180***                                          | -0.185***                               |
| Valence-weighted ad exposure (n=1054)             | -0.154***            | -0.161***                                          | -0.195***                               |
| Valence-weighted media exposure (n=698)           | -0.188***            | -0.217***                                          | -0.142***                               |
| Valence-weighted interpersonal discussion (n=305) | -0.306***            | -0.328***                                          | -0.350***                               |

Note. Cell entries are bivariate Spearman's rho estimates. \*p<.05, \*\*p<.01, \*\*\*p<.0005
